# Supplementary material for: Occurrence of Chlamydia spp. in Conjunctival Samples of Stray Cats in Timișoara Municipality, Western Romania
Source: MDPI journal article supplement (doi:10.3390/microorganisms10112187), 2022-11-04

## Results of descriptive statistic:

### Sex

|            | Frequency | Percent | Valid Percent | Cumulative Percent |
|------------|-----------|---------|---------------|--------------------|
| Valid Male | 55        | 57,9    | 57,9          | 57,9               |
| Female     | 40        | 42,1    | 42,1          | 100,0              |
| Total      | 95        | 100,0   | 100,0         |                    |

### Age

|                           | Frequency | Percent | Valid Percent | Cumulative Percent |
|---------------------------|-----------|---------|---------------|--------------------|
| Valid < 2 months          | 26        | 27,4    | 27,4          | 27,4               |
| > 2 months and < 6 months | 31        | 32,6    | 32,6          | 60,0               |
| > 6 months and < 2 years  | 30        | 31,6    | 31,6          | 91,6               |
| > 2 years                 | 8         | 8,4     | 8,4           | 100,0              |
| Total                     | 95        | 100,0   | 100,0         |                    |

### Type

|                        | Frequency | Percent | Valid Percent | Cumulative Percent |
|------------------------|-----------|---------|---------------|--------------------|
| Valid Symptomatic cats | 27        | 28,4    | 28,4          | 28,4               |
| Asymptomatic cats      | 68        | 71,6    | 71,6          | 100,0              |
| Total                  | 95        | 100,0   | 100,0         |                    |

### Type

|                        | Frequency | Percent | Valid Percent | Cumulative Percent |
|------------------------|-----------|---------|---------------|--------------------|
| Valid Symptomatic cats | 27        | 28,4    | 28,4          | 28,4               |
| Asymptomatic cats      | 68        | 71,6    | 71,6          | 100,0              |
| Total                  | 95        | 100,0   | 100,0         |                    |

| Positive |                                              |         |               |                    |
|----------|----------------------------------------------|---------|---------------|--------------------|
|          | Frequency                                    | Percent | Valid Percent | Cumulative Percent |
| Valid    | Synptomatic cats Positive PCR for Chlamydia  | 17      | 17,9          | 17,9               |
|          | Asynptomatic cats Positive PCR for Chlamydia | 46      | 48,4          | 66,3               |
|          | Negative                                     | 32      | 33,7          | 100,0              |
|          | Total                                        | 95      | 100,0         |                    |

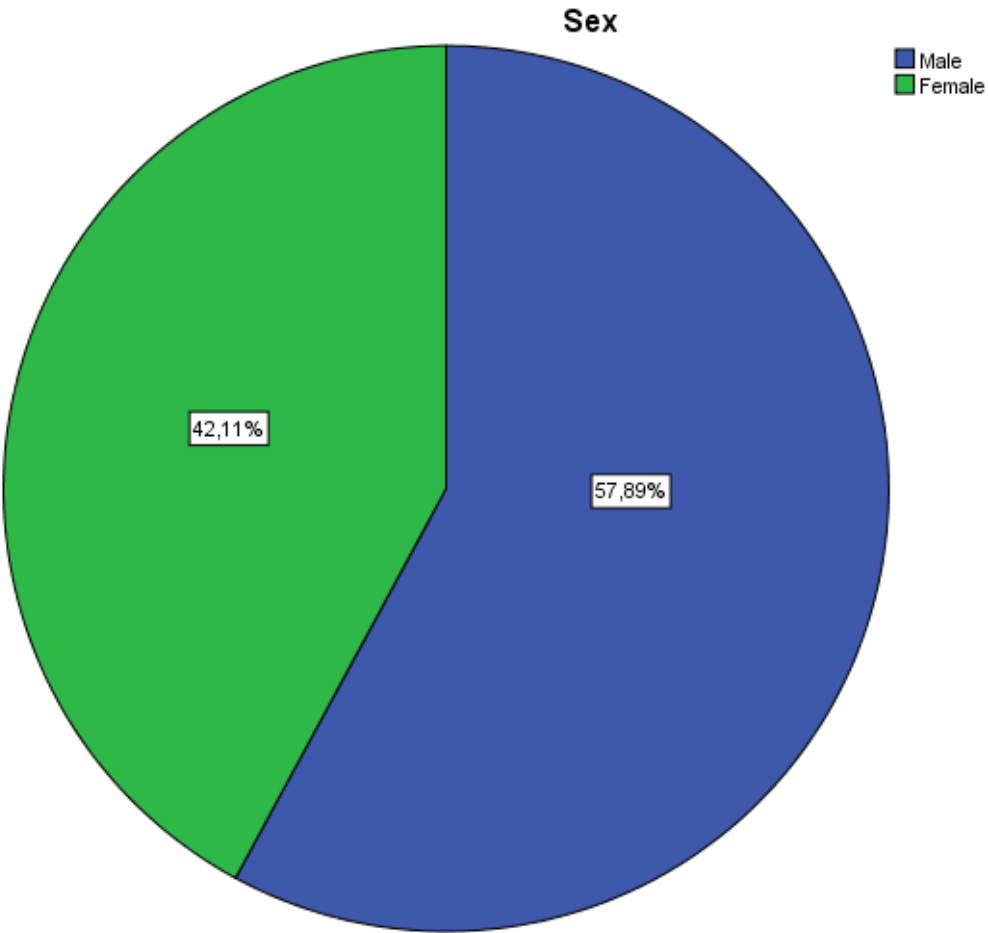

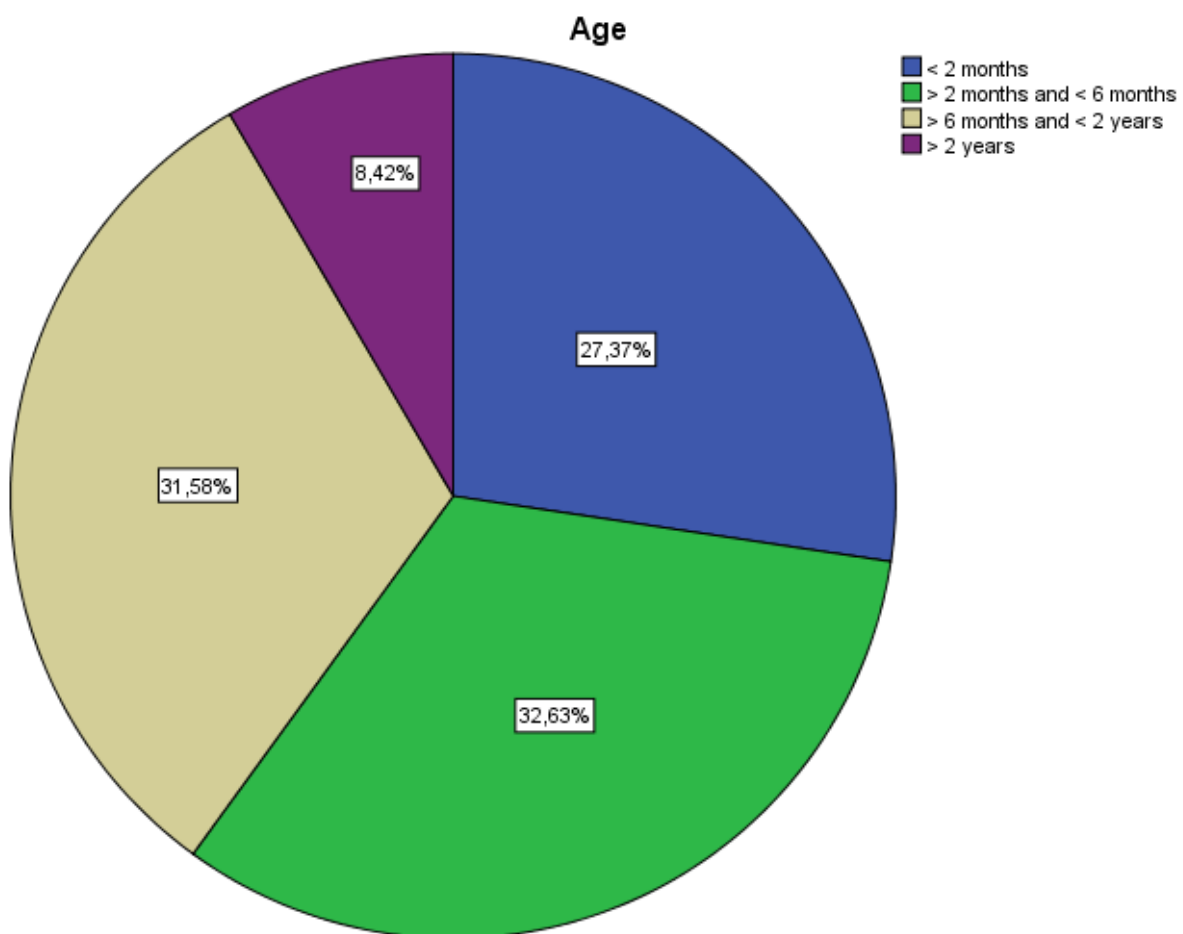

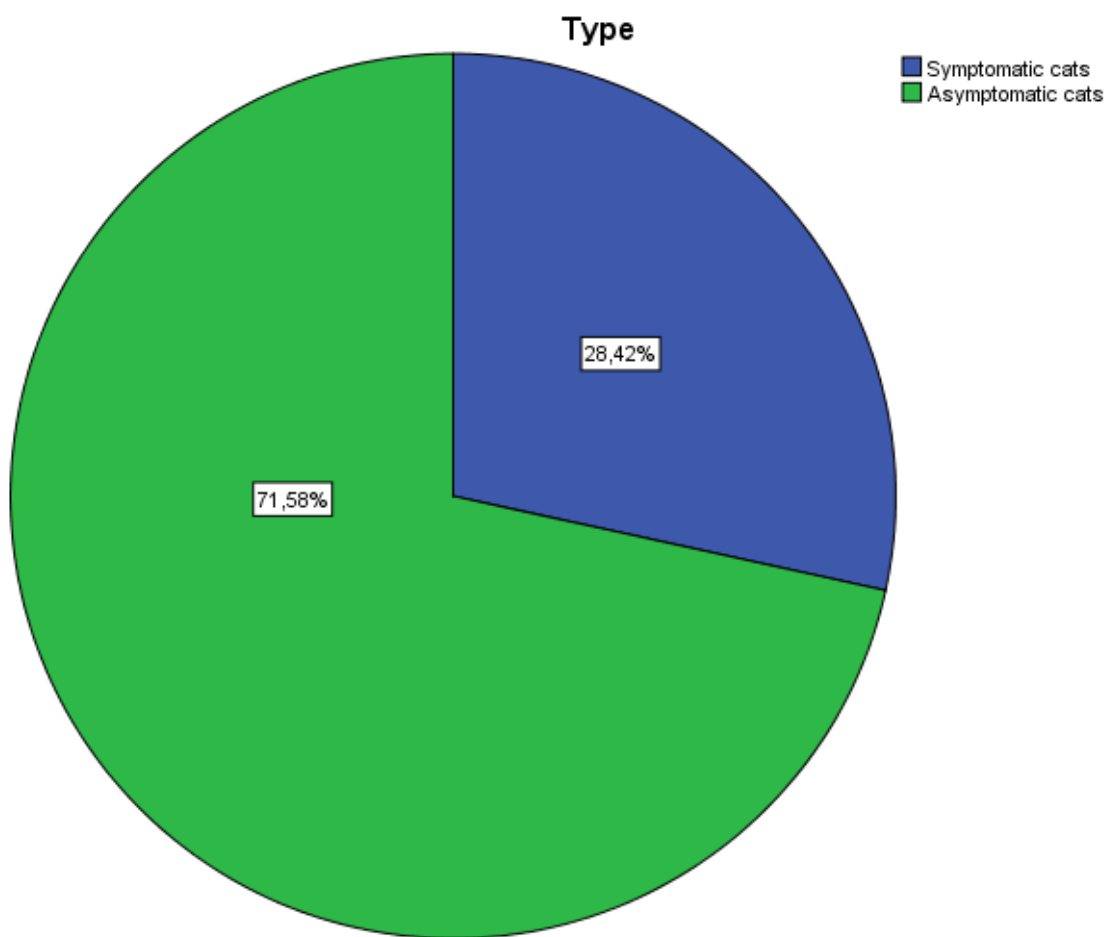

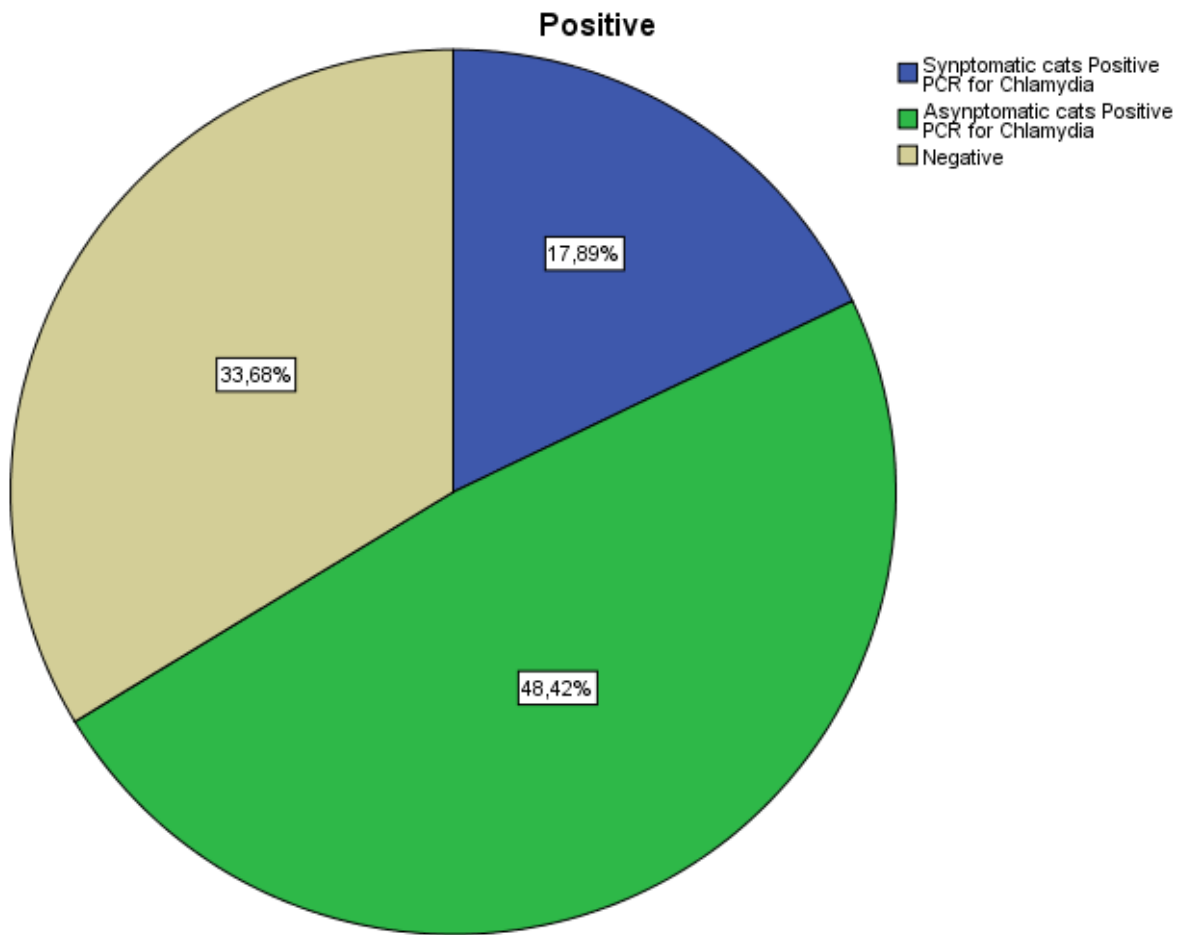

Supplement: s1 [file s1]
